# Supplementary material for: Subcutaneous Administration of Apolipoprotein J-Derived Mimetic Peptide d-[113–122]apoJ Improves LDL and HDL Function and Prevents Atherosclerosis in LDLR-KO Mice
Source: PubMed Central journal article supplement (PMC7356811; doi:10.3390/biom10060829), 2020-05-29
Supplement: biomolecules-10-00829-s001.pdf [file biomolecules-10-00829-s001.pdf]

# Subcutaneous Administration of Apolipoprotein J-derived Mimetic Peptide D-[113–122]apoJ Improves LDL and HDL Function and Prevents Atherosclerosis in LDLR-KO Mice

Andrea Rivas-Urbina, Anna Rull, Joile Aldana-Ramos, David Santos, Nuria Puig, Nuria Farre-Cabrerizo, Sonia Benitez, Antonio Perez, David de Gonzalo-Calvo, Joan Carles Escola-Gil, Josep Julve, Jordi Ordoñez-Llanos and Jose Luis Sanchez-Quesada

## Supplementary materials

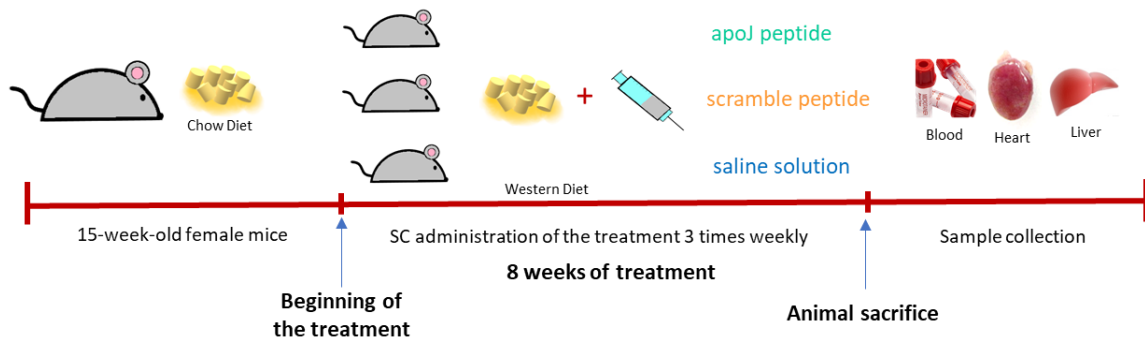

Figure S1. Experimental design flow chart.

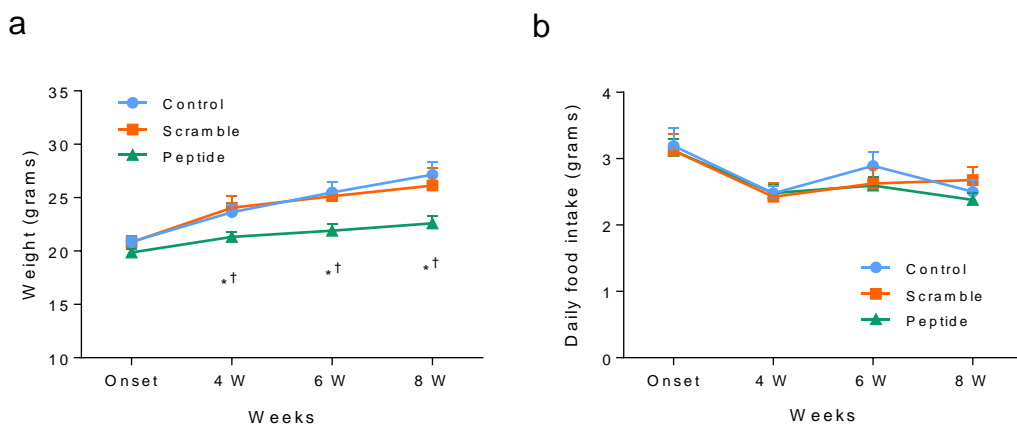

Figure S2. Weight-related parameters. (a) Increment of weight after 8 weeks on western diet. (b) Daily food intake. Data are the mean  $\pm$  SEM of 8 mice from the control and scramble group, and 12 mice from the peptide group. \*  $p < 0.05$  vs control mice. †  $p < 0.05$  vs scramble mice.

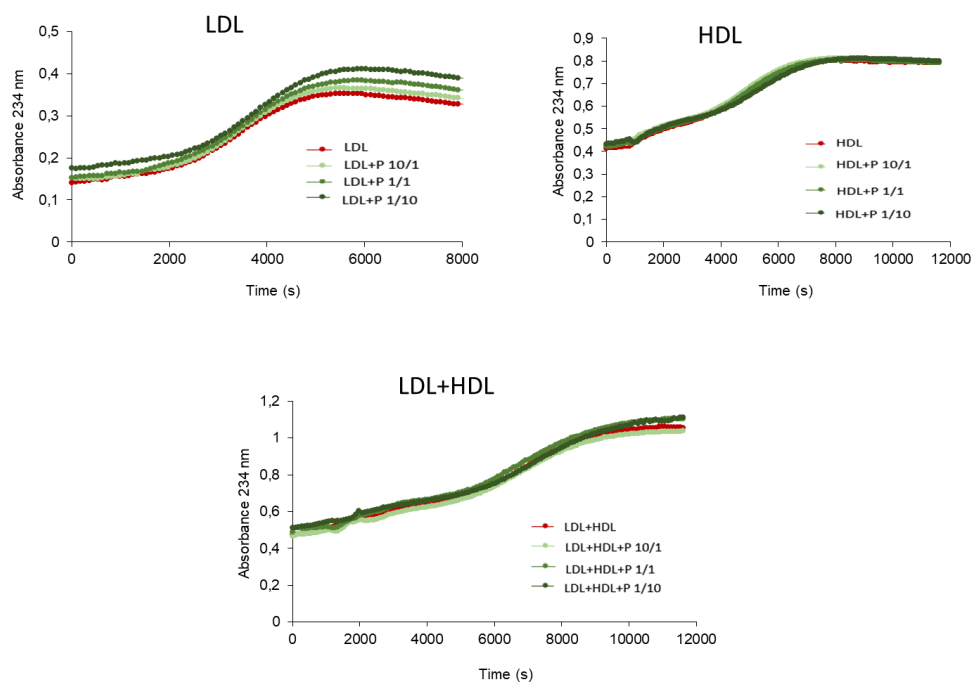

**Figure S3.** In vitro oxidation analysis of human LDL and HDL in presence of D-[113–122]apoJ peptide. Oxidation of lipoproteins was induced by adding 5  $\mu\text{M}$   $\text{CuSO}_4$  and monitored at 234 nm, as described in Methods. Molar ratios of 10:1, 1:1 and 1:10 apoB:peptide or apoA-I:peptide were used.

**Table S1.** Univariate correlations of atherosclerosis development and lipoprotein function parameters. Data were analyzed using the Spearman’s rho correlation analysis. Significant correlations are shown in yellow.

|                                     |                                     |                            | Atherosclerosis | HDL_susceptibility<br>_to_oxidation | HDL_Antioxidant<br>capacity | Cholesterol<br>efflux | LDL_susceptibility<br>_to_oxidation | LDL_aggregation | LDL(-) |
|-------------------------------------|-------------------------------------|----------------------------|-----------------|-------------------------------------|-----------------------------|-----------------------|-------------------------------------|-----------------|--------|
| Spearman rho<br>correlation         | Atherosclerosis                     | Correlation<br>coefficient | 1,000           | ,656**                              | ,300                        | -,460                 | ,068                                | -,174           | ,730** |
|                                     |                                     | Sig. (bilateral)           |                 | ,005                                | ,164                        | ,098                  | ,783                                | ,427            | ,009   |
|                                     |                                     | N                          | 24              | 24                                  | 24                          | 14                    | 24                                  | 24              | 12     |
|                                     | HDL_susceptibility<br>_to_oxidation | Correlation<br>coefficient |                 | 1,000                               | ,452                        | -,242                 | ,660**                              | -,080           | ,011   |
|                                     |                                     | Sig. (bilateral)           |                 |                                     | ,031                        | ,404                  | ,002                                | ,716            | ,974   |
|                                     |                                     | N                          |                 | 24                                  | 24                          | 14                    | 24                                  | 24              | 12     |
|                                     | HDL_Antioxidant<br>capacity         | Correlation<br>coefficient |                 |                                     | 1,000                       | ,185                  | ,386                                | ,271            | -,105  |
|                                     |                                     | Sig. (bilateral)           |                 |                                     |                             | ,527                  | ,102                                | ,212            | ,745   |
| N                                   |                                     |                            |                 | 24                                  | 14                          | 24                    | 24                                  | 12              |        |
| Cholesterol_efflux                  | Correlation<br>coefficient          |                            |                 |                                     | 1,000                       | -,096                 | ,042                                | -,084           |        |
|                                     | Sig. (bilateral)                    |                            |                 |                                     |                             | ,754                  | ,887                                | ,830            |        |
|                                     | N                                   |                            |                 |                                     | 14                          | 14                    | 14                                  | 9               |        |
| LDL_susceptibility<br>_to_oxidation | Correlation<br>coefficient          |                            |                 |                                     |                             | 1,000                 | ,136                                | -,437           |        |
|                                     | Sig. (bilateral)                    |                            |                 |                                     |                             |                       | ,578                                | ,240            |        |
|                                     | N                                   |                            |                 |                                     |                             | 24                    | 24                                  | 9               |        |
| LDL_aggregation                     | Correlation<br>coefficient          |                            |                 |                                     |                             |                       | 1,000                               | -,653*          |        |
|                                     | Sig. (bilateral)                    |                            |                 |                                     |                             |                       |                                     | ,021            |        |
|                                     | N                                   |                            |                 |                                     |                             |                       | 24                                  | 12              |        |
| LDL(-)                              | Correlation<br>coefficient          |                            |                 |                                     |                             |                       |                                     | 1,000           |        |
|                                     | Sig. (bilateral)                    |                            |                 |                                     |                             |                       |                                     |                 |        |
|                                     | N                                   |                            |                 |                                     |                             |                       |                                     | 12              |        |

\*\* P < 0,01 (bilateral).

\* P < 0,05 (bilateral).

**Table S2.** Linear regression model relating atherosclerosis development with HDL susceptibility to oxidation and LDL electronegativity. Data are expressed as standardized beta ( $\beta$ ).

| HDL Susceptibility to Oxidation                                                                                                          |         |                 | LDL(-)                                                                                                                         |         |                 |
|------------------------------------------------------------------------------------------------------------------------------------------|---------|-----------------|--------------------------------------------------------------------------------------------------------------------------------|---------|-----------------|
| Association between atherosclerosis and HDL susceptibility to oxidation after adjusting for each of the following variables ( $\beta$ ): | $\beta$ | <i>p</i> -Value | Association between atherosclerosis and LDL electronegativity after adjusting for each of the following variables ( $\beta$ ): | $\beta$ | <i>p</i> -Value |
| HDL Antioxidant capacity                                                                                                                 | 0.618   | 0.004           | HDL susceptibility to oxidation                                                                                                | 0.577   | 0.011           |
| Cholesterol efflux                                                                                                                       | 0.562   | 0.036           | HDL Antioxidant capacity                                                                                                       | 0.569   | 0.061           |
| LDL susceptibility to oxidation                                                                                                          | 1.033   | <0.001          | Cholesterol efflux                                                                                                             | 0.486   | 0.210           |
| LDL aggregation                                                                                                                          | 0.611   | 0.002           | LDL susceptibility to oxidation                                                                                                | 0.681   | 0.088           |
| LDL(-)                                                                                                                                   | 0.640   | 0.006           | LDL aggregation                                                                                                                | 0.719   | 0.054           |
| Cholesterol                                                                                                                              | 0.634   | 0.005           | Cholesterol                                                                                                                    | 0.668   | 0.024           |
| Triglycerides                                                                                                                            | 0.628   | 0.002           | Triglycerides                                                                                                                  | 0.653   | 0.053           |
| Phospholipids                                                                                                                            | 0.620   | 0.002           | Phospholipids                                                                                                                  | 0.645   | 0.057           |
| VLDL-c                                                                                                                                   | 0.637   | 0.002           | VLDL-c                                                                                                                         | 0.704   | 0.033           |
| LDL-c                                                                                                                                    | 0.561   | 0.008           | LDL-c                                                                                                                          | 0.485   | 0.146           |
| HDL-c                                                                                                                                    | 0.618   | 0.003           | HDL-c                                                                                                                          | 0.627   | 0.044           |

$\beta$  estimates of HDL susceptibility to oxidation and LDL electronegativity when adjusted for each variable. Each row is a model containing that variable and the main variable in the heading.

**Table S3.** Association between atherosclerosis and treatment group after adjusting for the main variables of lipid profile and lipoprotein function. Data are expressed as standardized beta ( $\beta$ ).

|                                                                                                                          | $\beta$ | <i>p</i> -Value |
|--------------------------------------------------------------------------------------------------------------------------|---------|-----------------|
| Treatment group                                                                                                          | 0.455   | 0.029           |
| Association between atherosclerosis and treatment group after adjusting for each of the following variables ( $\beta$ ): |         |                 |
| HDL susceptibility to oxidation                                                                                          | 0.320   | 0.070           |
| HDL Antioxidant capacity                                                                                                 | 0.444   | 0.057           |
| Cholesterol efflux                                                                                                       | 0.368   | 0.249           |
| LDL susceptibility to oxidation                                                                                          | 0.452   | 0.058           |
| LDL aggregation                                                                                                          | 0.460   | 0.030           |
| LDL(-)                                                                                                                   | 0.257   | 0.415           |
| Cholesterol                                                                                                              | 0.464   | 0.023           |
| Triglycerides                                                                                                            | 0.553   | 0.018           |
| Phospholipids                                                                                                            | 0.481   | 0.030           |
| VLDL-c                                                                                                                   | 0.492   | 0.023           |
| LDL-c                                                                                                                    | 0.368   | 0.105           |
| HDL-c                                                                                                                    | 0.526   | 0.014           |

$\beta$  estimates for the treatment when adjusted for each variable in the row.
